# Supplementary material for: Unraveling the influence of Indoxyl Sulfate and apixaban in drug metabolism and elimination: Is sex a major player?
Source: Research Square preprint supplement (doi:10.21203/rs.3.rs-4945804/v1), 2024-10-17
Supplement: Supplementary file 1 [file 358f2e089e3c07ca9b397b96.xlsx]

## Sheet: Sheet 1
id
